# Supplementary material
Source: PubMed Central journal article supplement (PMC1418644)
Supplement: iai_74_3_1907__1.pdf [file iai_74_3_1907__1.pdf]

## Complete list of significantly regulated genes 4 hours following intramammary LPS (Zheng et al. 2005)

| Affymetrix ID | p value | Fold Change | Gene name                                                                     | Gene Symbol     |
|---------------|---------|-------------|-------------------------------------------------------------------------------|-----------------|
| 1449984_at    | 0.003   | 103.92      | chemokine (C-X-C motif) ligand 2                                              | Cxcl2           |
| 1419394_s_at  | 0.008   | 79.99       | S100 calcium binding protein A8 (calgranulin A)                               | S100a8          |
| 1449326_x_at  | 0.025   | 38.88       | serum amyloid A 2                                                             | Saa2            |
| 1419075_s_at  | 0.026   | 38.79       | serum amyloid A 2                                                             | Saa1 /// Saa2   |
| 1419209_at    | 0.006   | 37.37       | chemokine (C-X-C motif) ligand 1                                              | Cxcl1           |
| 1450788_at    | 0.016   | 35.86       | serum amyloid A 1                                                             | ---             |
| 1448756_at    | 0.026   | 25.87       | S100 calcium binding protein A9 (calgranulin B)                               | S100a9          |
| 1418930_at    | 0.030   | 23.16       | chemokine (C-X-C motif) ligand 10                                             | Cxcl10          |
| 1450826_a_at  | 0.025   | 22.64       | serum amyloid A 3                                                             | Saa3            |
| 1438855_x_at  | 0.020   | 20.54       | tumor necrosis factor, alpha-induced protein 2                                | ---             |
| 1455899_x_at  | 0.003   | 20.27       | suppressor of cytokine signaling 3                                            | Socs3           |
| 1419427_at    | 0.020   | 16.17       | colony stimulating factor 3 (granulocyte)                                     | Csf3            |
| 1419598_at    | 0.017   | 15.74       | membrane-spanning 4-domains, subfamily A, member 6D                           | Ms4a6d          |
| 1425829_a_at  | 0.010   | 15.32       | Tnfa-induced adipose-related protein                                          | Tnfaip9         |
| 1417483_at    | 0.005   | 13.86       | molecule possessing ankyrin-repeats induced by lipopolysaccharide             | Nfkbiz          |
| 1427514_at    | 0.022   | 13.34       |                                                                               | ---             |
| 1453181_x_at  | 0.001   | 12.95       | phospholipid scramblase 1                                                     | Plscr1          |
| 1418666_at    | 0.009   | 12.94       | pentaxin related gene                                                         | Ptx3            |
| 1416010_a_at  | 0.013   | 12.02       | EH-domain containing 1                                                        | Ehd1            |
| 1422474_at    | 0.008   | 11.37       | phosphodiesterase 4B, cAMP specific                                           | Pde4b           |
| 1420504_at    | 0.005   | 10.97       | solute carrier family 6 (neurotransmitter transporter), member 14             | Slc6a14         |
| 1417268_at    | 0.006   | 10.07       | CD14 antigen                                                                  | Cd14            |
| 1419599_s_at  | 0.033   | 9.73        | membrane-spanning 4-domains, subfamily A, member 6D                           | Ms4a11          |
| 1423233_at    | 0.002   | 8.41        | CCAAT/enhancer binding protein (C/EBP), delta                                 | Cebpd           |
| 1419647_a_at  | 0.001   | 7.65        | immediate early response 3                                                    | Ier3            |
| 1460197_a_at  | 0.003   | 7.64        | Tnfa-induced adipose-related protein                                          | Tnfaip9         |
| 1451564_at    | 0.043   | 7.05        | similar to hypothetical protein, MGC: 7868                                    | Parp14          |
| 1450297_at    | 0.005   | 6.77        | interleukin 6                                                                 | Il6             |
| 1428572_at    | 0.049   | 6.69        | brain abundant, membrane attached signal protein 1                            | Basp1           |
| 1424923_at    | 0.005   | 6.60        |                                                                               | Serpina3g       |
| 1426818_at    | 0.017   | 6.10        | sterol O-acyltransferase 1                                                    | Arrdc4          |
| 1418866_at    | 0.029   | 6.05        | cytochrome P450, 24                                                           | Cyp24a1         |
| 1426276_at    | 0.049   | 5.91        | RIKEN cDNA 9130009C22 gene                                                    | Ifih1           |
| 1449731_s_at  | 0.001   | 5.76        | nuclear factor of kappa light chain gene enhancer in B-cells inhibitor, alpha | ---             |
| 1448830_at    | 0.006   | 5.73        | dual specificity phosphatase 1                                                | Dusp1           |
| 1417065_at    | 0.015   | 5.65        | early growth response 1                                                       | Egr1            |
| 1427736_a_at  | 0.019   | 5.58        | chemokine (C-C motif) receptor-like 2                                         | Ccr12           |
| 1449591_at    | 0.004   | 5.54        | caspase 4, apoptosis-related cysteine protease                                | Casp11          |
| 1415899_at    | 0.000   | 5.49        | Jun-B oncogene                                                                | Junb            |
| 1455393_at    | 0.005   | 5.40        | ceruloplasmin                                                                 | Cp              |
| 1448568_a_at  | 0.005   | 5.29        | solute carrier family 20, member 1                                            | Slc20a1         |
| 1448748_at    | 0.045   | 5.26        | pleckstrin                                                                    | Plek            |
| 1448734_at    | 0.001   | 5.21        | ceruloplasmin                                                                 | Cp              |
| 1416700_at    | 0.016   | 5.19        | ras homolog gene family, member E                                             | Rhoe            |
| 1416083_at    | 0.010   | 5.17        | zinc finger protein 216                                                       | Za20d2          |
| 1421392_a_at  | 0.005   | 5.16        | baculoviral IAP repeat-containing 2                                           | Birc3           |
| 1419132_at    | 0.006   | 5.14        | toll-like receptor 2                                                          | Tlr2            |
| 1435906_x_at  | 0.040   | 5.11        | guanylate nucleotide binding protein 2                                        | Gbp2            |
| 1416085_s_at  | 0.015   | 4.84        | zinc finger protein 216                                                       | Za20d2          |
| 1416011_x_at  | 0.006   | 4.82        | EH-domain containing 1                                                        | Ehd1            |
| 1433508_at    | 0.035   | 4.81        | core promoter element binding protein                                         | Copeb           |
| 1417140_a_at  | 0.001   | 4.77        | protein tyrosine phosphatase, non-receptor type 2                             | Ptpn2           |
| 1451860_a_at  | 0.046   | 4.71        | tripartite motif protein 30                                                   | Trim30          |
| 1424067_at    | 0.006   | 4.68        | intercellular adhesion molecule                                               | Icam1           |
| 1422473_at    | 0.010   | 4.67        | phosphodiesterase 4B, cAMP specific                                           | Pde4b           |
| 1419208_at    | 0.008   | 4.66        | mitogen activated protein kinase kinase kinase 8                              | Map3k8          |
| 1417494_a_at  | 0.007   | 4.65        | ceruloplasmin                                                                 | Cp              |
| 1417292_at    | 0.045   | 4.54        | interferon gamma inducible protein                                            | Ifi47           |
| 1448175_at    | 0.013   | 4.51        | EH-domain containing 1                                                        | Ehd1            |
| 1417426_at    | 0.035   | 4.50        | proteoglycan, secretory granule                                               | Prg1            |
| 1452349_x_at  | 0.015   | 4.49        | interferon activated gene 205                                                 | Ifi205 /// Mnda |
| 1435415_x_at  | 0.001   | 4.48        | MARCKS-like protein                                                           | Mlp             |
| 1448306_at    | 0.000   | 4.47        | nuclear factor of kappa light chain gene enhancer in B-cells inhibitor, alpha | Nfkbia          |
| 1417495_x_at  | 0.003   | 4.41        | ceruloplasmin                                                                 | Cp              |
| 1423100_at    | 0.000   | 4.33        | FBJ osteosarcoma oncogene                                                     | Fos             |
| 1422286_a_at  | 0.017   | 4.22        | TG interacting factor                                                         | Tgif            |
| 1417262_at    | 0.014   | 4.13        | prostaglandin-endoperoxide synthase 2                                         | Ptgs2           |

|              |       |      |                                                                               |               |
|--------------|-------|------|-------------------------------------------------------------------------------|---------------|
| 1452519_a_at | 0.000 | 4.07 | zinc finger protein 36                                                        | Zfp36         |
| 1449773_s_at | 0.032 | 4.05 | growth arrest and DNA-damage-inducible 45 beta                                | Gadd45b       |
| 1417821_at   | 0.001 | 4.02 | G7e protein                                                                   | D17H6S56E-5   |
| 1419383_at   | 0.005 | 3.99 | S100 protein, beta polypeptide, neural                                        | ---           |
| 1449109_at   | 0.001 | 3.95 | suppressor of cytokine signaling 2                                            | Socs2         |
| 1452231_x_at | 0.026 | 3.94 | interferon activated gene 205                                                 | Ifi203        |
| 1434025_at   | 0.028 | 3.93 | Kruppel-like factor 5                                                         | ---           |
| 1437667_a_at | 0.028 | 3.92 | BTB and CNC homology 2                                                        | Bach2         |
| 1424354_at   | 0.040 | 3.86 | RIKEN cDNA 1110007F12 gene                                                    | 1110007F12Rik |
| 1429527_a_at | 0.000 | 3.86 | phospholipid scramblase 1                                                     | Plscr1        |
| 1437226_x_at | 0.004 | 3.85 | MARCKS-like protein                                                           | Mlp           |
| 1435627_x_at | 0.003 | 3.81 | MARCKS-like protein                                                           | Mlp           |
| 1420088_at   | 0.000 | 3.80 | nuclear factor of kappa light chain gene enhancer in B-cells inhibitor, alpha | ---           |
| 1430701_a_at | 0.029 | 3.73 | RIKEN cDNA 5730528L13 gene                                                    | 5730528L13Rik |
| 1433575_at   | 0.001 | 3.72 | SRY-box containing gene 4                                                     | Sox4          |
| 1415922_s_at | 0.007 | 3.68 | MARCKS-like protein                                                           | Mlp           |
| 1426083_a_at | 0.032 | 3.67 | B-cell translocation gene 1, anti-proliferative                               | Btg1          |
| 1418280_at   | 0.023 | 3.62 | core promoter element binding protein                                         | Klf6          |
| 1417314_at   | 0.017 | 3.56 | histocompatibility 2, complement component factor B                           | H2-Bf         |
| 1419561_at   | 0.024 | 3.56 | chemokine (C-C motif) ligand 3                                                | Ccl3          |
| 1417654_at   | 0.013 | 3.54 | syndecan 4                                                                    | Sdc4          |
| 1420558_at   | 0.009 | 3.54 | selectin, platelet                                                            | Selp          |
| 1435327_at   | 0.000 | 3.53 | Mus musculus adult female vagina cDNA, RIKEN full-length enriched library     | AW112037      |
| 1416530_a_at | 0.020 | 3.51 | purine-nucleoside phosphorylase                                               | Pnp           |
| 1416084_at   | 0.013 | 3.50 | zinc finger protein 216                                                       | Za20d2        |
| 1415971_at   | 0.021 | 3.48 | myristoylated alanine rich protein kinase C substrate                         | Marcks        |
| 1419706_a_at | 0.031 | 3.44 | A kinase (PRKA) anchor protein (gravin) 12                                    | Akap12        |
| 1425379_at   | 0.015 | 3.42 | hepatocyte growth factor                                                      | Hgf           |
| 1422267_at   | 0.012 | 3.42 | forkhead box B2                                                               | Foxb2         |
| 1417496_at   | 0.023 | 3.41 | ceruloplasmin                                                                 | Cp            |
| 1426753_at   | 0.015 | 3.41 | RIKEN cDNA D530048A03 gene                                                    | Phf17         |
| 1420380_at   | 0.019 | 3.38 | chemokine (C-C motif) ligand 2                                                | Ccl2          |
| 1418401_a_at | 0.008 | 3.38 | dual specificity phosphatase 16                                               | Dusp16        |
| 1417822_at   | 0.006 | 3.38 | G7e protein                                                                   | D17H6S56E-5   |
| 1416432_at   | 0.014 | 3.37 | RIKEN cDNA E330010H22 gene                                                    | Pfkfb3        |
| 1460386_a_at | 0.036 | 3.35 | solute carrier family 1, member 1                                             | Slc1a1        |
| 1418133_at   | 0.001 | 3.32 | B-cell leukemia/lymphoma 3                                                    | Bcl3          |
| 1418507_s_at | 0.001 | 3.24 | expressed sequence A1527257                                                   | D130043N08Rik |
| 1427635_at   | 0.001 | 3.21 | kinesin family member 5A                                                      | ---           |
| 1421811_at   | 0.007 | 3.20 | thrombospondin 1                                                              | Thbs1         |
| 1437455_a_at | 0.013 | 3.20 | B-cell translocation gene 1, anti-proliferative                               | Btg1          |
| 1417508_at   | 0.000 | 3.20 | ring finger protein (C3HC4 type) 19                                           | Rnf19         |
| 1438562_a_at | 0.002 | 3.18 | protein tyrosine phosphatase, non-receptor type 2                             | Ptpn2         |
| 1450256_at   | 0.040 | 3.17 | cerberus 1 homolog (Xenopus laevis)                                           | Cer1          |
| 1431055_a_at | 0.005 | 3.16 | RIKEN cDNA 2410004M09 gene                                                    | Snx10         |
| 1417409_at   | 0.025 | 3.16 | Jun oncogene                                                                  | Jun           |
| 1438097_at   | 0.000 | 3.15 | RAB20, member RAS oncogene family                                             | Rab20         |
| 1438606_a_at | 0.016 | 3.12 | chloride intracellular channel 4 (mitochondrial)                              | Clic4         |
| 1424349_a_at | 0.005 | 3.11 | hypothetical protein LOC226856                                                | Lpgat1        |
| 1448961_at   | 0.033 | 3.11 | phospholipid scramblase 2                                                     | Plscr2        |
| 1418424_at   | 0.000 | 3.09 | tumor necrosis factor alpha induced protein 6                                 | Tnfaip6       |
| 1454606_at   | 0.002 | 3.07 | RIKEN cDNA 4933426M11 gene                                                    | 4933426M11Rik |
| 1450644_at   | 0.007 | 3.05 | zinc finger protein 36, C3H type-like 1                                       | Zfp36l1       |
| 1452241_at   | 0.025 | 3.04 | RIKEN cDNA 2810429C13 gene                                                    | Topbp1        |
| 1460302_at   | 0.004 | 3.04 | thrombospondin 1                                                              | Thbs1         |
| 1419004_s_at | 0.044 | 3.04 | B-cell leukemia/lymphoma 2 related protein A1a                                | Bcl2a1a       |
| 1416250_at   | 0.000 | 3.03 | B-cell translocation gene 2, anti-proliferative                               | Btg2          |
| 1453299_a_at | 0.047 | 3.00 | purine-nucleoside phosphorylase                                               | Pnp           |
| 1426604_at   | 0.000 | 3.00 | ESTs, Moderately similar to RIKEN cDNA 5730493B19                             | Rnasel        |
| 1448234_at   | 0.023 | 2.99 | DnaJ (Hsp40) homolog, subfamily B, member 6                                   | Dnajb6        |
| 1422984_at   | 0.015 | 2.96 | cytoplasmic linker 2                                                          | ---           |
| 1429219_at   | 0.016 | 2.96 | RIKEN cDNA 1200009F10 gene                                                    | 1200009F10Rik |
| 1452237_at   | 0.009 | 2.95 | HIV-1 Rev binding protein                                                     | Hrb           |
| 1451612_at   | 0.003 | 2.92 | metallothionein 1                                                             | ---           |
| 1451318_a_at | 0.025 | 2.92 | Yamaguchi sarcoma viral (v-yes-1) oncogene homolog                            | Lyn           |
| 1426923_at   | 0.002 | 2.90 | HIV-1 Rev binding protein                                                     | Hrb           |
| 1437626_at   | 0.001 | 2.89 | Mus musculus Brf2 gene, 3' UTR                                                | Zfp36l2       |
| 1424343_a_at | 0.021 | 2.88 | eukaryotic translation initiation factor 1A                                   | Eif1a         |
| 1452402_at   | 0.029 | 2.88 | 12 days embryo male wolffian duct includes surrounding region cDNA            | Uchl3         |
| 1415972_at   | 0.026 | 2.86 | myristoylated alanine rich protein kinase C substrate                         | Marcks        |

|              |       |      |                                                                                 |                 |
|--------------|-------|------|---------------------------------------------------------------------------------|-----------------|
| 1421529_a_at | 0.002 | 2.84 | thioredoxin reductase 1                                                         | Txnrd1          |
| 1450715_at   | 0.022 | 2.83 | cytochrome P450, 1a2, aromatic compound inducible                               | Cyp1a2          |
| 1448617_at   | 0.035 | 2.83 | CD53 antigen                                                                    | Cd53            |
| 1429776_a_at | 0.042 | 2.82 | DnaJ (Hsp40) homolog, subfamily B, member 6                                     | Dnajb6          |
| 1422279_at   | 0.046 | 2.82 | Friend virus susceptibility 1                                                   | Fv1             |
| 1433428_x_at | 0.020 | 2.79 | transglutaminase 2, C polypeptide                                               | Tgm2            |
| 1435458_at   | 0.008 | 2.77 | proviral integration site 1                                                     | Pim1            |
| 1418903_at   | 0.003 | 2.75 | aquaporin 2                                                                     | Aqp2            |
| 1423017_a_at | 0.043 | 2.75 | interleukin 1 receptor antagonist                                               | Il1rn           |
| 1419690_at   | 0.003 | 2.74 | RIKEN cDNA 2610002M06 gene                                                      | 2610002M06Rik   |
| 1420147_at   | 0.048 | 2.73 |                                                                                 | Smad2           |
| 1449801_at   | 0.012 | 2.70 | keratin complex 2, basic, gene 10                                               | ---             |
| 1422045_a_at | 0.003 | 2.70 | protein tyrosine phosphatase, non-receptor type 12                              | Ptpn12          |
| 1420459_at   | 0.049 | 2.69 | Down syndrome critical region homolog 6 (human)                                 | Dscr6           |
| 1416129_at   | 0.041 | 2.68 | RIKEN cDNA 1300002F13 gene                                                      | 1300002F13Rik   |
| 1452214_at   | 0.029 | 2.68 | RIKEN cDNA 9130011J04 gene                                                      | 9130011J04Rik   |
| 1420623_x_at | 0.026 | 2.66 | heat shock protein 8                                                            | Hspa8           |
| 1417333_at   | 0.000 | 2.65 |                                                                                 | Rasa4           |
| 1450829_at   | 0.018 | 2.65 | tumor necrosis factor, alpha-induced protein 3                                  | Tnfaip3         |
| 1448793_a_at | 0.029 | 2.64 | syndecan 4                                                                      | Sdc4            |
| 1437067_at   | 0.002 | 2.62 | RIKEN cDNA 1110054G21 gene                                                      | Phf2            |
| 1423393_at   | 0.029 | 2.62 | chloride intracellular channel 4 (mitochondrial)                                | Clic4           |
| 1419704_at   | 0.036 | 2.62 | cytochrome P450, steroid inducible 3a41                                         | Cyp3a41         |
| 1422868_s_at | 0.034 | 2.61 | guanine deaminase                                                               | Gda             |
| 1417558_at   | 0.003 | 2.60 | Fyn proto-oncogene                                                              | Fyn             |
| 1423754_at   | 0.009 | 2.60 | fragilis                                                                        | Ifitm3          |
| 1452348_s_at | 0.025 | 2.60 | interferon activated gene 205                                                   | ---             |
| 1448610_a_at | 0.019 | 2.60 | superoxide dismutase 2, mitochondrial                                           | Sod2            |
| 1452870_at   | 0.009 | 2.59 | RIKEN cDNA 6230400I06 gene                                                      | Apaf1           |
| 1438524_x_at | 0.010 | 2.59 | RIKEN cDNA 5730463C12 gene                                                      | Pnrc1           |
| 1428346_at   | 0.023 | 2.58 | FLN29 gene product                                                              | MGI:1923551     |
| 1416237_at   | 0.003 | 2.58 | epithelial V-like antigen                                                       | Eva1            |
| 1450324_a_at | 0.007 | 2.58 | RIKEN cDNA 4930521E07 gene                                                      | 4930521E07Rik   |
| 1435326_at   | 0.003 | 2.56 | adult female vagina cDNA, RIKEN full-length enriched library, 9930106P14        | AW112037        |
| 1435872_at   | 0.009 | 2.55 | proviral integration site 1                                                     | Pim1            |
| 1450986_at   | 0.007 | 2.54 | nucleolar protein 5                                                             | Nol5            |
| 1420622_a_at | 0.039 | 2.54 | heat shock protein 8                                                            | Hspa8           |
| 1437992_x_at | 0.014 | 2.53 | gap junction membrane channel protein alpha 1                                   | Gja1            |
| 1453092_at   | 0.001 | 2.53 | RIKEN cDNA 2300002G24 gene                                                      | 2300002G24Rik   |
| 1418514_at   | 0.009 | 2.52 | metal response element binding transcription factor 2                           | Mtf2            |
| 1455725_a_at | 0.018 | 2.52 | H3 histone, family 3B                                                           | H3f3b           |
| 1429144_at   | 0.024 | 2.51 | RIKEN cDNA 2310032D16 gene                                                      | 2310032D16Rik   |
| 1439426_x_at | 0.028 | 2.50 | lysozyme                                                                        | Lzp-s           |
| 1448272_at   | 0.000 | 2.49 | B-cell translocation gene 2, anti-proliferative                                 | Btg2            |
| 1448764_a_at | 0.034 | 2.48 | fatty acid binding protein 1, liver                                             | Fabp1           |
| 1438650_x_at | 0.018 | 2.47 | gap junction membrane channel protein alpha 1                                   | Gja1            |
| 1416077_at   | 0.026 | 2.46 | adrenomedullin                                                                  | Adm             |
| 1418996_a_at | 0.037 | 2.46 | RIKEN cDNA 4930469P12 gene                                                      | 4930469P12Rik   |
| 1436759_x_at | 0.016 | 2.45 | calponin 3, acidic                                                              | Cnn3            |
| 1419603_at   | 0.032 | 2.45 | interferon activated gene 204                                                   | lfi204 /// Mnda |
| 1423037_at   | 0.004 | 2.45 | angiotensin receptor-like 1                                                     | Agtr1           |
| 1449322_at   | 0.000 | 2.43 | protein tyrosine phosphatase 4a1                                                | Ptp4a1          |
| 1432478_a_at | 0.002 | 2.42 | RIKEN cDNA 4930534K13 gene                                                      | lbrdc3          |
| 1429321_at   | 0.009 | 2.42 | RIKEN cDNA 1600023E10 gene                                                      | Rnf149          |
| 1420631_a_at | 0.000 | 2.40 | bladder cancer associated protein homolog (human)                               | Blcap           |
| 1428942_at   | 0.010 | 2.40 | metallothionein 2                                                               | Mt2             |
| 1418637_at   | 0.003 | 2.39 | ets variant gene 3                                                              | Etv3            |
| 1431008_at   | 0.037 | 2.38 | RIKEN cDNA 0610037M15 gene                                                      | 0610037M15Rik   |
| 1435226_at   | 0.004 | 2.37 | RIKEN cDNA 4930555L03 gene                                                      | lbrdc3          |
| 1423954_at   | 0.043 | 2.37 | complement component 3                                                          | C3              |
| 1449195_s_at | 0.001 | 2.36 | Cxc chemokine ligand 16                                                         | Cxcl16          |
| 1416268_at   | 0.001 | 2.36 | E26 avian leukemia oncogene 2, 3' domain                                        | Ets2            |
| 1452160_at   | 0.045 | 2.35 | adult male olfactory brain cDNA, RIKEN full-length enriched library, 6430549I20 | Tiparp          |
| 1436996_x_at | 0.034 | 2.35 | lysozyme                                                                        | Lzp-s           |
| 1438657_x_at | 0.000 | 2.34 | protein tyrosine phosphatase 4a1                                                | Ptp4a1          |
| 1423392_at   | 0.017 | 2.33 | chloride intracellular channel 4 (mitochondrial)                                | Clic4           |
| 1416012_at   | 0.028 | 2.33 | EH-domain containing 1                                                          | Ehd1            |
| 1448728_a_at | 0.011 | 2.33 | molecule possessing ankyrin-repeats induced by lipopolysaccharide               | Nfkbiz          |
| 1416576_at   | 0.003 | 2.31 | suppressor of cytokine signaling 3                                              | Socs3           |
| 1424350_s_at | 0.016 | 2.31 | hypothetical protein LOC226856                                                  | Lpgat1          |

|              |       |      |                                                                       |               |
|--------------|-------|------|-----------------------------------------------------------------------|---------------|
| 1426587_a_at | 0.002 | 2.30 | signal transducer and activator of transcription 3                    | Stat3         |
| 1436392_s_at | 0.013 | 2.30 | transcription factor AP-2, gamma                                      | Tcfap2c       |
| 1450645_at   | 0.044 | 2.30 | metallothionein 4                                                     | Mt4           |
| 1450188_s_at | 0.050 | 2.30 | lipase, endothelial                                                   | Lipg          |
| 1424880_at   | 0.029 | 2.30 | RIKEN cDNA A530090O15 gene                                            | Trib1         |
| 1416881_at   | 0.041 | 2.30 | myeloid cell leukemia sequence 1                                      | Mcl1          |
| 1448232_x_at | 0.001 | 2.30 | tubulin, alpha 6                                                      | Tuba6         |
| 1420697_at   | 0.013 | 2.29 | cAMP inducible gene 1                                                 | Slc15a3       |
| 1437277_x_at | 0.026 | 2.29 | transglutaminase 2, C polypeptide                                     | Tgm2          |
| 1419156_at   | 0.001 | 2.29 | SRY-box containing gene 4                                             | Sox4          |
| 1416128_at   | 0.002 | 2.29 | tubulin, alpha 6                                                      | Tuba6         |
| 1420376_a_at | 0.006 | 2.27 | H3 histone, family 3B                                                 | H3f3b         |
| 1416897_at   | 0.022 | 2.27 | cDNA sequence BC003281                                                | Parp9         |
| 1426799_at   | 0.012 | 2.27 | RIKEN cDNA D330025I23 gene                                            | Rab8b         |
| 1422422_at   | 0.001 | 2.26 | defensin related cryptdin 4                                           | Defcr4        |
| 1450958_at   | 0.024 | 2.25 | transmembrane 4 superfamily member 1                                  | Tm4sf1        |
| 1452492_a_at | 0.032 | 2.25 | solute carrier family 37 (glycerol-3-phosphate transporter), member 1 | Slc37a2       |
| 1423760_at   | 0.021 | 2.25 | CD44 antigen                                                          | Cd44          |
| 1448881_at   | 0.035 | 2.25 | haptoglobin                                                           | Hp            |
| 1417193_at   | 0.033 | 2.24 | superoxide dismutase 2, mitochondrial                                 | Sod2          |
| 1428781_at   | 0.004 | 2.21 | RIKEN cDNA 1110014F24 gene                                            | 1110014F24Rik |
| 1422029_at   | 0.037 | 2.21 | chemokine (C-C motif) ligand 20                                       | Ccl20         |
| 1434620_s_at | 0.019 | 2.19 | hypothetical protein MGC37079                                         | 2610024E20Rik |
| 1420609_at   | 0.008 | 2.19 | axotrophin                                                            | ---           |
| 1423475_at   | 0.015 | 2.19 | cyclin M2                                                             | Cnm2          |
| 1436902_x_at | 0.050 | 2.19 | thymosin, beta 10                                                     | Tmsb10        |
| 1455946_x_at | 0.014 | 2.19 | thymosin, beta 10                                                     | Tmsb10        |
| 1426368_at   | 0.000 | 2.18 | Ras and Rab interactor 2                                              | ---           |
| 1450489_at   | 0.016 | 2.16 | sal-like 1 (Drosophila)                                               | Sall1         |
| 1431314_a_at | 0.005 | 2.16 | RIKEN cDNA 5830417I10 gene                                            | 5830417I10Rik |
| 1451272_a_at | 0.000 | 2.16 | RIKEN cDNA 2510010F15 gene                                            | 2510010F15Rik |
| 1427348_at   | 0.011 | 2.15 | hypothetical protein MGC41320                                         | BC036563      |
| 1424425_a_at | 0.007 | 2.15 | RIKEN cDNA 1300019I21 gene                                            | Mtap          |
| 1436836_x_at | 0.039 | 2.15 | calponin 3, acidic                                                    | Cnn3          |
| 1417856_at   | 0.001 | 2.15 | avian reticuloendotheliosis viral (v-rel) oncogene related B          | Relb          |
| 1451798_at   | 0.037 | 2.15 | interleukin 1 receptor antagonist                                     | Il1rn         |
| 1456605_at   | 0.005 | 2.14 | CCAAT/enhancer binding protein (C/EBP), delta                         | ---           |
| 1454268_a_at | 0.032 | 2.14 | cytochrome b-245, alpha polypeptide                                   | Cyba          |
| 1427747_a_at | 0.005 | 2.14 | lipocalin 2                                                           | Lcn2          |
| 1452397_at   | 0.016 | 2.13 | Similar to hypothetical protein FLJ10652, clone IMAGE:536954          | 2810474O19Rik |
| 1420886_a_at | 0.003 | 2.13 | X-box binding protein 1                                               | Xbp1          |
| 1435097_at   | 0.002 | 2.13 | nuclear distribution gene C homolog (Aspergillus)                     | Mmap          |
| 1428083_at   | 0.033 | 2.13 | RIKEN cDNA 2310043N10 gene                                            | 2310043N10Rik |
| 1423142_a_at | 0.001 | 2.13 | GTP binding protein 4                                                 | Gtpbp4        |
| 1433668_at   | 0.000 | 2.11 | RIKEN cDNA 5730463C12 gene                                            | Pnrc1         |
| 1448503_at   | 0.025 | 2.11 | myeloid cell leukemia sequence 1                                      | Mcl1          |
| 1437185_s_at | 0.034 | 2.11 | thymosin, beta 10                                                     | Tmsb10        |
| 1451382_at   | 0.014 | 2.11 | RIKEN cDNA 1810008K03 gene                                            | 1810008K03Rik |
| 1418901_at   | 0.005 | 2.10 | CCAAT/enhancer binding protein (C/EBP), beta                          | ---           |
| 1427705_a_at | 0.010 | 2.10 | nuclear factor of kappa light chain gene enhancer in B-cells 1, p105  | Nfkb1         |
| 1438354_x_at | 0.034 | 2.10 | calponin 3, acidic                                                    | Cnn3          |
| 1416304_at   | 0.003 | 2.10 | LPS-induced TN factor                                                 | Litaf         |
| 1421855_at   | 0.029 | 2.09 | fibrinogen-like protein 2                                             | Fgl2          |
| 1456699_s_at | 0.033 | 2.09 | hypothetical protein LOC231386                                        | A730098D12Rik |
| 1460351_at   | 0.046 | 2.09 | S100 calcium binding protein A11 (calizzarin)                         | ---           |
| 1421228_at   | 0.014 | 2.08 | chemokine (C-C motif) ligand 7                                        | Ccl7          |
| 1451639_at   | 0.001 | 2.07 | CCAAT/enhancer binding protein (C/EBP), gamma                         | Cebpg         |
| 1416303_at   | 0.003 | 2.07 | LPS-induced TN factor                                                 | Litaf         |
| 1423547_at   | 0.021 | 2.07 | lysozyme                                                              | Lyzs          |
| 1427689_a_at | 0.021 | 2.05 | TNFAIP3 interacting protein 1                                         | Tnip1         |
| 1453239_a_at | 0.019 | 2.04 | DNA segment, Chr 19, ERATO Doi 675, expressed                         | Ankrd22       |
| 1422625_at   | 0.001 | 2.04 | lymphocyte antigen 6 complex, locus H                                 | Ly6h          |
| 1450377_at   | 0.002 | 2.03 | thrombospondin 1                                                      | Thbs1         |
| 1435133_at   | 0.015 | 2.02 | UDP-glucose ceramide glucosyltransferase                              | Ugcg          |
| 1455789_x_at | 0.011 | 2.01 | heat shock protein 8                                                  | ---           |
| 1433725_at   | 0.000 | 2.01 | 12 days embryo female mullerian duct includes surrounding region cDNA | Acvr1b        |
| 1448605_at   | 0.005 | 2.00 | ras homolog gene family, member C                                     | Rhoc          |
| 1450873_at   | 0.004 | 1.99 | GTP binding protein 4                                                 | Gtpbp4        |
| 1420499_at   | 0.022 | 1.99 | GTP cyclohydrolase 1                                                  | Gch1          |
| 1422508_at   | 0.004 | 1.99 | RIKEN cDNA B230379M23 gene                                            | Atp6v1a1      |

|              |       |                                                                                    |                   |
|--------------|-------|------------------------------------------------------------------------------------|-------------------|
| 1419455_at   | 0.022 | 1.98 interleukin 10 receptor, beta                                                 | Ii10rb            |
| 1419267_at   | 0.002 | 1.98 nuclear transcription factor-Y beta                                           | Nfyb              |
| 1455930_at   | 0.018 | 1.98 Mus musculus, clone MGC:6827 IMAGE:2649084, mRNA, complete cds                | ---               |
| 1419536_a_at | 0.001 | 1.97 v-rel reticuloendotheliosis viral oncogene homolog A, (avian)                 | Rela              |
| 1457676_at   | 0.023 | 1.97 expressed sequence AA407980                                                   | C130027E04Rik     |
| 1451523_a_at | 0.018 | 1.97 RIKEN cDNA 2310075G12 gene                                                    | 2310075G12Rik     |
| 1421881_a_at | 0.020 | 1.96 ELAV (embryonic lethal, abnormal vision, Drosophila)-like 2 (Hu antigen B)    | Elavl2            |
| 1418162_at   | 0.005 | 1.96 toll-like receptor 4                                                          | Tlr4              |
| 1422126_a_at | 0.005 | 1.96 RIKEN cDNA 4933433B15 gene                                                    | Nudt13            |
| 1448185_at   | 0.007 | 1.95 homocysteine-inducible ubiquitin-like domain member 1                         | Herpud1           |
| 1437615_s_at | 0.001 | 1.95 expressed sequence AU042646                                                   | 5730409F24Rik     |
| 1450957_a_at | 0.006 | 1.94 sequestosome 1                                                                | Sqstm1            |
| 1425523_at   | 0.005 | 1.94 RIKEN cDNA 2610015J01 gene                                                    | 2600011C06Rik     |
| 1436684_a_at | 0.012 | 1.93 RIKEN cDNA 2010110K24 gene                                                    | Riok2             |
| 1437223_s_at | 0.002 | 1.93 X-box binding protein 1                                                       | Xbp1              |
| 1448162_at   | 0.009 | 1.93 vascular cell adhesion molecule 1                                             | Vcam1             |
| 1449874_at   | 0.017 | 1.93 lymphocyte antigen 96                                                         | Ly96              |
| 1433850_at   | 0.001 | 1.93 hypothetical protein LOC232314                                                | Ppp4r2            |
| 1418854_at   | 0.004 | 1.92 baculoviral IAP repeat-containing 3                                           | Birc2             |
| 1425837_a_at | 0.002 | 1.91 CCR4 carbon catabolite repression 4-like (S. cerevisiae)                      | Ccrn4l            |
| 1455105_at   | 0.015 | 1.91 protein tyrosine phosphatase, non-receptor type 12                            | Ptpn12            |
| 1460700_at   | 0.005 | 1.91 signal transducer and activator of transcription 3                            | Stat3             |
| 1449524_at   | 0.010 | 1.90 ectodysplasin-A                                                               | Eda               |
| 1416701_at   | 0.011 | 1.89 ras homolog gene family, member E                                             | Rhoe              |
| 1448169_at   | 0.008 | 1.89 keratin complex 1, acidic, gene 18                                            | Krt1-18           |
| 1438458_a_at | 0.011 | 1.89 RIKEN cDNA 1110004P21 gene                                                    | Sfpq              |
| 1427347_s_at | 0.024 | 1.89 tubulin, beta 2                                                               | ---               |
| 1419139_at   | 0.001 | 1.89 growth differentiation factor 5                                               | Gdf5              |
| 1417450_a_at | 0.001 | 1.88 transforming, acidic coiled-coil containing protein 3                         | Tacc3             |
| 1436893_a_at | 0.005 | 1.88 axotrophin                                                                    | ---               |
| 1421457_a_at | 0.041 | 1.88 SAM domain, SH3 domain and nuclear localisation signals, 1                    | Samsn1            |
| 1425336_x_at | 0.011 | 1.88 histocompatibility 2, K region                                                | H2-K1             |
| 1422612_at   | 0.021 | 1.88 hexokinase 2                                                                  | HK2               |
| 1424824_at   | 0.036 | 1.88 expressed sequence AA675320                                                   | 9630044O09Rik     |
| 1427844_a_at | 0.005 | 1.87 CCAAT/enhancer binding protein (C/EBP), beta                                  | Cebpb             |
| 1451636_at   | 0.026 | 1.87 RIKEN cDNA A930021G21 gene                                                    | Ankrd33           |
| 1423401_at   | 0.028 | 1.86 ets variant gene 6 (TEL oncogene)                                             | Etv6              |
| 1453223_s_at | 0.005 | 1.86 RIKEN cDNA 2410088E07 gene                                                    | Dppa2             |
| 1438992_x_at | 0.001 | 1.86 activating transcription factor 4                                             | Atf4              |
| 1455570_x_at | 0.006 | 1.85 calponin 3, acidic                                                            | Cnn3              |
| 1456212_x_at | 0.007 | 1.84 suppressor of cytokine signaling 3                                            | Socs3             |
| 1448862_at   | 0.030 | 1.84 intercellular adhesion molecule 2                                             | Icam2             |
| 1417068_a_at | 0.001 | 1.84 protein tyrosine phosphatase, non-receptor type 1                             | Ptpn1             |
| 1421268_at   | 0.003 | 1.84 UDP-glucose ceramide glucosyltransferase                                      | Ugcg              |
| 1448135_at   | 0.009 | 1.84 activating transcription factor 4                                             | Atf4              |
| 1418867_at   | 0.003 | 1.84 cytochrome P450, 24                                                           | Cyp24a1           |
| 1422638_s_at | 0.023 | 1.84 Ras association (RalGDS/AF-6) domain family 5                                 | Rassf5            |
| 1438945_x_at | 0.040 | 1.83 gap junction membrane channel protein alpha 1                                 | Gja1              |
| 1417500_a_at | 0.043 | 1.83 transglutaminase 2, C polypeptide                                             | Tgm2              |
| 1421640_a_at | 0.008 | 1.83 TRAF family member-associated Nf-kappa B activator                            | Tank              |
| 1421889_a_at | 0.032 | 1.83 amyloid beta (A4) precursor-like protein 2                                    | Aplp2             |
| 1421207_at   | 0.016 | 1.83 leukemia inhibitory factor                                                    | Lif               |
| 1448981_x_at | 0.006 | 1.83 T-cell leukemia/lymphoma 1B, 1                                                | Tcl1b1            |
| 1422557_s_at | 0.004 | 1.83 metallothionein 1                                                             | Mt1               |
| 1417045_at   | 0.007 | 1.83 BH3 interacting domain death agonist                                          | Bid               |
| 1453678_at   | 0.031 | 1.83 methyl-CpG binding domain protein 1                                           | Mbd1              |
| 1451316_a_at | 0.002 | 1.83 hypothetical protein MGC19382                                                 | Picalm            |
| 1420089_at   | 0.001 | 1.82 nuclear factor of kappa light chain gene enhancer in B-cells inhibitor, alpha | ---               |
| 1421612_a_at | 0.035 | 1.82 RIKEN cDNA 4933432H23 gene                                                    | H2afy2 /// H2afy3 |
| 1437468_x_at | 0.002 | 1.82 F-box and WD-40 domain protein 1B                                             | Fbxw11            |
| 1416880_at   | 0.007 | 1.82 myeloid cell leukemia sequence 1                                              | Mcl1              |
| 1420011_s_at | 0.008 | 1.82 X-box binding protein 1                                                       | Xbp1              |
| 1418936_at   | 0.007 | 1.82 v-maf musculoaponeurotic fibrosarcoma oncogene family, protein F (avian)      | Maff              |
| 1429568_x_at | 0.000 | 1.81 RIKEN cDNA 2510010F15 gene                                                    | 2510010F15Rik     |
| 1441023_at   | 0.002 | 1.80 eukaryotic translation initiation factor 2, subunit 2 (beta)                  | Eif2s2            |
| 1421816_at   | 0.049 | 1.80 glutathione reductase 1                                                       | Gsr               |
| 1423799_at   | 0.018 | 1.80 suppressor of initiator codon mutations, related sequence 1 (S. cerevisiae)   | Sui1-rs1          |
| 1438459_x_at | 0.006 | 1.80 RIKEN cDNA 1110004P21 gene                                                    | 1110004P21Rik     |
| 1435519_at   | 0.004 | 1.80 hypothetical protein LOC215449                                                | Rap1b             |
| 1421923_at   | 0.033 | 1.80 SH3-domain binding protein 5 (BTK-associated)                                 | ---               |

|              |       |       |                                                                             |               |
|--------------|-------|-------|-----------------------------------------------------------------------------|---------------|
| 1434432_at   | 0.005 | 1.79  | ligase III, DNA, ATP-dependent                                              | 1700051E09Rik |
| 1425731_at   | 0.004 | 1.79  | RIKEN cDNA 5730519E19 gene                                                  | Ankrd24       |
| 1416094_at   | 0.005 | 1.79  | a disintegrin and metalloproteinase domain 9 (meltrin gamma)                | Adam9         |
| 1448167_at   | 0.005 | 1.79  | interferon gamma receptor                                                   | Ifngr1        |
| 1440831_at   | 0.001 | 1.79  | RIKEN cDNA 6230421P05 gene                                                  | 6230421P05Rik |
| 1434005_at   | 0.049 | 1.79  | RIKEN cDNA 2600014B10 gene                                                  | ---           |
| 1439403_x_at | 0.001 | 1.78  | Hoxa1 regulated gene                                                        | Rnf12         |
| 1417566_at   | 0.028 | 1.78  | RIKEN cDNA 1300003D03 gene                                                  | Abhd5         |
| 1455002_at   | 0.000 | 1.78  | protein tyrosine phosphatase 4a1                                            | Ptp4a1        |
| 1421269_at   | 0.022 | 1.77  | UDP-glucose ceramide glucosyltransferase                                    | Ugcg          |
| 1422506_a_at | 0.022 | 1.77  | cystatin B                                                                  | Cstb          |
| 1449399_a_at | 0.017 | 1.77  | interleukin 1 beta                                                          | Il1b          |
| 1427574_s_at | 0.001 | 1.77  | SH3 domain protein D19                                                      | Sh3d19        |
| 1420618_at   | 0.014 | 1.77  | RIKEN cDNA 4930447D24 gene                                                  | Cpeb4         |
| 1419149_at   | 0.003 | 1.76  | serine (or cysteine) proteinase inhibitor, clade E, member 1                | Serpine1      |
| 1431917_at   | 0.001 | 1.76  |                                                                             | ---           |
| 1427489_at   | 0.002 | 1.76  | integrin alpha 8                                                            | Itga8         |
| 1419230_at   | 0.004 | 1.76  | keratin complex 1, acidic, gene 12                                          | Krt1-12       |
| 1427337_at   | 0.013 | 1.76  | adult male liver tumor cDNA, RIKEN full-length enriched library, C730035L17 | Aldh8a1       |
| 1416249_at   | 0.001 | 1.75  | cDNA sequence BC004012                                                      | BC004012      |
| 1455316_x_at | 0.012 | 1.75  |                                                                             | Ccrn4l        |
| 1448436_a_at | 0.022 | 1.75  | interferon regulatory factor 1                                              | Irf1          |
| 1460323_at   | 0.016 | 1.75  | DNA segment, Chr 15, Wayne State University 59, expressed                   | Tars          |
| 1425393_a_at | 0.000 | 1.74  | mitogen activated protein kinase kinase 7                                   | Map2k7        |
| 1456132_x_at | 0.017 | 1.74  | transforming growth factor beta 1 induced transcript 4                      | Tgfb14        |
| 1422662_at   | 0.049 | 1.74  | lectin, galactose binding, soluble 8                                        | Lgals8        |
| 1450375_at   | 0.006 | 1.74  | persephin                                                                   | Pspn          |
| 1425742_a_at | 0.024 | 1.74  | transforming growth factor beta 1 induced transcript 4                      | Tgfb14        |
| 1424948_x_at | 0.047 | 1.74  | histocompatibility 2, K region                                              | H2-D1         |
| 1419659_s_at | 0.002 | 1.74  | cysteine-rich hydrophobic domain 2                                          | Chic2         |
| 1420617_at   | 0.007 | 1.73  | RIKEN cDNA 4930447D24 gene                                                  | Cpeb4         |
| 1422414_a_at | 0.046 | 1.73  | calmodulin 2                                                                | Calm2         |
| 1416138_at   | 0.004 | 1.73  | annexin A7                                                                  | Anxa7         |
| 1460634_at   | 0.037 | 1.73  | ral guanine nucleotide dissociation stimulator                              | Ralgds        |
| 1420498_a_at | 0.001 | 1.72  | disabled homolog 2 (Drosophila)                                             | Dab2          |
| 1424211_at   | 0.013 | 1.71  | RIKEN cDNA 5730438N18 gene                                                  | 5730438N18Rik |
| 1424509_at   | 0.009 | 1.71  | RIKEN cDNA 1190003K14 gene                                                  | 1190003K14Rik |
| 1418990_at   | 0.019 | 1.71  | membrane-spanning 4-domains, subfamily A, member 4D                         | Ms4a4d        |
| 1427610_at   | 0.011 | 1.71  | Mus musculus, clone IMAGE:4983756, mRNA, partial cds                        | Dsp           |
| 1416248_at   | 0.007 | 1.71  | cDNA sequence BC004012                                                      | BC004012      |
| 1415779_s_at | 0.015 | 1.71  | actin-like                                                                  | Actg1         |
| 1416321_s_at | 0.031 | 1.70  | proline arginine-rich end leucine-rich repeat                               | Prelp         |
| 1419277_at   | 0.002 | 1.70  | cDNA sequence BC021769                                                      | Usp48         |
| 1448771_a_at | 0.002 | 1.70  | ferritin heavy chain                                                        | Fth1          |
| 1437172_x_at | 0.023 | -1.70 | RIKEN cDNA 4930479F15 gene                                                  | Hadhb         |
| 1424855_at   | 0.034 | -1.71 | expressed sequence A1607300                                                 | Thedc1        |
| 1454611_a_at | 0.007 | -1.71 | calmodulin 1                                                                | Calm1         |
| 1439459_x_at | 0.005 | -1.72 | ATP citrate lyase                                                           | Acly          |
| 1427284_a_at | 0.006 | -1.72 | tocopherol (alpha) transfer protein                                         | Ttpa          |
| 1415720_s_at | 0.011 | -1.72 | RIKEN cDNA 0610009D16 gene                                                  | Mad211bp      |
| 1424155_at   | 0.011 | -1.73 | fatty acid binding protein 4, adipocyte                                     | Fabp4         |
| 1426458_at   | 0.011 | -1.73 | RIKEN cDNA D330001L02 gene                                                  | Slmap         |
| 1418300_a_at | 0.005 | -1.73 | MAP kinase-interacting serine/threonine kinase 2                            | Mknk2         |
| 1455897_x_at | 0.013 | -1.73 | high mobility group nucleosomal binding domain 1                            | Hmgn1         |
| 1426895_at   | 0.004 | -1.73 | zinc finger protein 191                                                     | Zfp191        |
| 1427195_at   | 0.027 | -1.74 | Mus musculus, clone IMAGE:3983419, mRNA                                     | ---           |
| 1437767_s_at | 0.015 | -1.74 | retinoblastoma-like 2                                                       | Fts           |
| 1448269_a_at | 0.024 | -1.75 | RIKEN cDNA 1200009K10 gene                                                  | Klh13         |
| 1449966_s_at | 0.001 | -1.75 | RIKEN cDNA 1500031K13 gene                                                  | Cab39l        |
| 1439411_a_at | 0.013 | -1.75 | RAN binding protein 16                                                      | Xpo7          |
| 1426743_at   | 0.002 | -1.75 | DIP13 beta                                                                  | MGI:2384914   |
| 1451851_a_at | 0.048 | -1.75 | Mus musculus, Similar to casein kappa, clone MGC:6214 IMAGE:3585272         | Csnk          |
| 1436750_a_at | 0.015 | -1.76 | 3-oxoacid CoA transferase                                                   | Oxct1         |
| 1416452_at   | 0.048 | -1.76 | ornithine aminotransferase                                                  | Oat           |
| 1451794_at   | 0.033 | -1.76 | hypothetical protein MGC30586                                               | Tmcc3         |
| 1451701_x_at | 0.004 | -1.77 | claudin 3                                                                   | Cldn3         |
| 1421852_at   | 0.032 | -1.77 | potassium channel, subfamily K, member 5                                    | Kcnk5         |
| 1450643_s_at | 0.006 | -1.77 | fatty acid Coenzyme A ligase, long chain 2                                  | Acsl1         |
| 1422492_at   | 0.013 | -1.77 | coproporphyrinogen oxidase                                                  | Cpox          |
| 1423452_at   | 0.011 | -1.78 | expressed sequence A1120141                                                 | Stk17b        |

|              |       |       |                                                                            |               |
|--------------|-------|-------|----------------------------------------------------------------------------|---------------|
| 1455812_x_at | 0.020 | -1.78 | Slit-like 2 (Drosophila)                                                   | Slit2         |
| 1427955_a_at | 0.012 | -1.79 | differentially expressed in B16F10 1                                       | Deb1          |
| 1422526_at   | 0.015 | -1.79 | fatty acid Coenzyme A ligase, long chain 2                                 | Acs1          |
| 1426857_a_at | 0.005 | -1.79 | RIKEN cDNA 2610207116 gene                                                 | Hsd12         |
| 1422407_s_at | 0.037 | -1.80 | Harvey rat sarcoma virus oncogene                                          | Hras1         |
| 1434791_at   | 0.013 | -1.80 | ATPase, H+ transporting, lysosomal V0 subunit a isoform 2                  | Atp6v0a2      |
| 1448690_at   | 0.000 | -1.80 | potassium channel, subfamily K, member 1                                   | Kcnk1         |
| 1435371_x_at | 0.010 | -1.81 | carboxylesterase 3                                                         | Ces3          |
| 1428657_at   | 0.047 | -1.83 | RIKEN cDNA 1110037N09 gene                                                 | 1110037N09Rik |
| 1455896_a_at | 0.003 | -1.83 | potassium channel, subfamily K, member 1                                   | Kcnk1         |
| 1420827_a_at | 0.023 | -1.83 | cyclin G1                                                                  | ---           |
| 1452919_a_at | 0.019 | -1.84 | RIKEN cDNA 1700012G19 gene                                                 | 1700012G19Rik |
| 1421469_a_at | 0.032 | -1.84 | signal transducer and activator of transcription 5A                        | Stat5a        |
| 1431213_a_at | 0.017 | -1.85 | ---                                                                        | ---           |
| 1460569_x_at | 0.003 | -1.87 | claudin 3                                                                  | Cldn3         |
| 1448382_at   | 0.005 | -1.87 | RIKEN cDNA 1300002P22 gene                                                 | Ehhadh        |
| 1431214_at   | 0.008 | -1.87 | ---                                                                        | ---           |
| 1450259_a_at | 0.021 | -1.88 | signal transducer and activator of transcription 5A                        | Stat5a        |
| 1426516_a_at | 0.009 | -1.88 | lipin 1                                                                    | Lpin1         |
| 1418083_at   | 0.005 | -1.88 | RIKEN cDNA 0610009B22 gene                                                 | 0610009B22Rik |
| 1425754_a_at | 0.042 | -1.90 | butyrophilin, subfamily 1, member A1                                       | Btn1a1        |
| 1431805_a_at | 0.008 | -1.90 | DNA segment, Chr 7, ERATO Doi 784, expressed                               | Rhpn2         |
| 1435058_x_at | 0.028 | -1.90 | syntaxin binding protein 3                                                 | Stxbp3        |
| 1416854_at   | 0.007 | -1.90 | solute carrier family 34 (sodium phosphate), member 2                      | Slc34a2       |
| 1424367_a_at | 0.002 | -1.90 | homer homolog 2 (Drosophila)                                               | Homer2        |
| 1452257_at   | 0.005 | -1.91 | 3-hydroxybutyrate dehydrogenase (heart, mitochondrial)                     | Bdh           |
| 1416996_at   | 0.000 | -1.92 | vascular Rab-GAP/TBC-containing                                            | Tbc1d8        |
| 1435370_a_at | 0.012 | -1.93 | carboxylesterase 3                                                         | Ces3          |
| 1433558_at   | 0.007 | -1.94 | RIKEN cDNA 2310011D08 gene                                                 | Dab2ip        |
| 1418341_at   | 0.011 | -1.96 | RAB4A, member RAS oncogene family                                          | Rab4a         |
| 1416698_a_at | 0.033 | -1.96 | CDC28 protein kinase 1                                                     | Cks1b         |
| 1436298_x_at | 0.003 | -1.96 | phosphoribosylaminoimidazole carboxylase                                   | Paics         |
| 1439396_x_at | 0.012 | -1.97 | glycerol-3-phosphate dehydrogenase 1 (soluble)                             | Gpd1          |
| 1456573_x_at | 0.005 | -1.97 | nicotinamide nucleotide transhydrogenase                                   | Nnt           |
| 1423652_at   | 0.001 | -1.97 | RIKEN cDNA 1810010A06 gene                                                 | Hbld2         |
| 1422997_s_at | 0.011 | -1.98 | mitochondrial acyl-CoA thioesterase 1                                      | Cte1          |
| 1449048_s_at | 0.009 | -2.01 | RAB4A, member RAS oncogene family                                          | ---           |
| 1427929_a_at | 0.027 | -2.02 | RIKEN cDNA 2310036D04 gene                                                 | 2310036D04Rik |
| 1454984_at   | 0.015 | -2.03 | RIKEN cDNA A230075M04 gene                                                 | A230075M04Rik |
| 1434553_at   | 0.001 | -2.06 | expressed sequence AW109744                                                | 4930577M16Rik |
| 1439045_x_at | 0.035 | -2.06 | RIKEN cDNA 4933406D09 gene                                                 | Mtac2d1       |
| 1428788_at   | 0.023 | -2.09 | RIKEN cDNA 1700012G19 gene                                                 | 1700012G19Rik |
| 1422476_at   | 0.022 | -2.09 | interferon gamma inducible protein 30                                      | Irf3          |
| 1449091_at   | 0.046 | -2.09 | claudin 8                                                                  | Cldn8         |
| 1439185_x_at | 0.021 | -2.11 | RIKEN cDNA D430028G21 gene                                                 | D430028G21Rik |
| 1456744_x_at | 0.049 | -2.16 | RIKEN cDNA B430214A04 gene                                                 | Flcn          |
| 1448400_a_at | 0.024 | -2.16 | SWI/SNF related, matrix associated, actin dependent regulator of chromatin | Smarcd2       |
| 1436959_x_at | 0.005 | -2.17 | nasal embryonic LHRH factor                                                | Nelf          |
| 1416779_at   | 0.014 | -2.20 | serum deprivation response                                                 | Sdpr          |
| 1449065_at   | 0.016 | -2.25 | cytosolic acyl-CoA thioesterase 1                                          | Cte1          |
| 1425718_a_at | 0.014 | -2.26 | Nd1                                                                        | Ivns1abp      |
| 1448551_a_at | 0.011 | -2.27 | tripartite motif protein 2                                                 | Trim2         |
| 1420821_at   | 0.004 | -2.28 | Mus musculus adult male stomach cDNA, RIKEN full-length enriched library   | Sgpp1         |
| 1419555_at   | 0.003 | -2.37 | E74-like factor 5                                                          | Elf5          |
| 1420657_at   | 0.021 | -2.47 | uncoupling protein 3, mitochondrial                                        | ---           |
| 1423651_at   | 0.005 | -2.47 | RIKEN cDNA 1810010A06 gene                                                 | Hbld2         |
| 1448201_at   | 0.002 | -2.47 | secreted frizzled-related sequence protein 2                               | Sfrp2         |
| 1450084_s_at | 0.008 | -2.59 | Nd1                                                                        | Ivns1abp      |
| 1435945_a_at | 0.032 | -2.62 | potassium intermediate/small conductance calcium-activated channel         | Kcnn4         |
| 1422973_a_at | 0.002 | -2.76 | thyroid hormone responsive SPOT14 homolog (Rattus)                         | Thrsp         |
| 1439445_x_at | 0.015 | -2.77 | ATP citrate lyase                                                          | ---           |
| 1424737_at   | 0.019 | -2.77 | thyroid hormone responsive SPOT14 homolog (Rattus)                         | Thrsp         |
| 1426614_at   | 0.014 | -2.88 | RIKEN cDNA 2010005116 gene                                                 | Prkcbp1       |
| 1424671_at   | 0.018 | -2.96 | RIKEN cDNA 1810013P09 gene                                                 | Plekhf1       |
| 1448021_at   | 0.001 | -3.09 | ESTs                                                                       | ---           |
| 1417027_at   | 0.027 | -3.21 | tripartite motif protein 2                                                 | Trim2         |
| 1442025_a_at | 0.034 | -3.26 | ESTs, Highly similar to 2118318A promyelocyte leukemia Zn finger protein   | ---           |
| 1434628_a_at | 0.043 | -3.35 | DNA segment, Chr 7, ERATO Doi 784, expressed                               | Rhpn2         |
| 1423176_at   | 0.002 | -3.74 | transducer of ErbB-2.1                                                     | Tob1          |
| 1418288_at   | 0.017 | -3.81 | lipin 1                                                                    | ---           |

|              |       |       |                                      |      |
|--------------|-------|-------|--------------------------------------|------|
| 1448666_s_at | 0.003 | -4.69 | Mus musculus molossinus unknown mRNA | Tob2 |
| 1448700_at   | 0.016 | -7.81 | G0/G1 switch gene 2                  | ---  |

---
